# Supplementary material for: c-Cbl Regulates Murine Subventricular Zone-Derived Neural Progenitor Cells in Dependence of the Epidermal Growth Factor Receptor
Source: MDPI journal article supplement (doi:10.3390/cells12192400), 2023-10-03
Supplement: s1 [file s1]

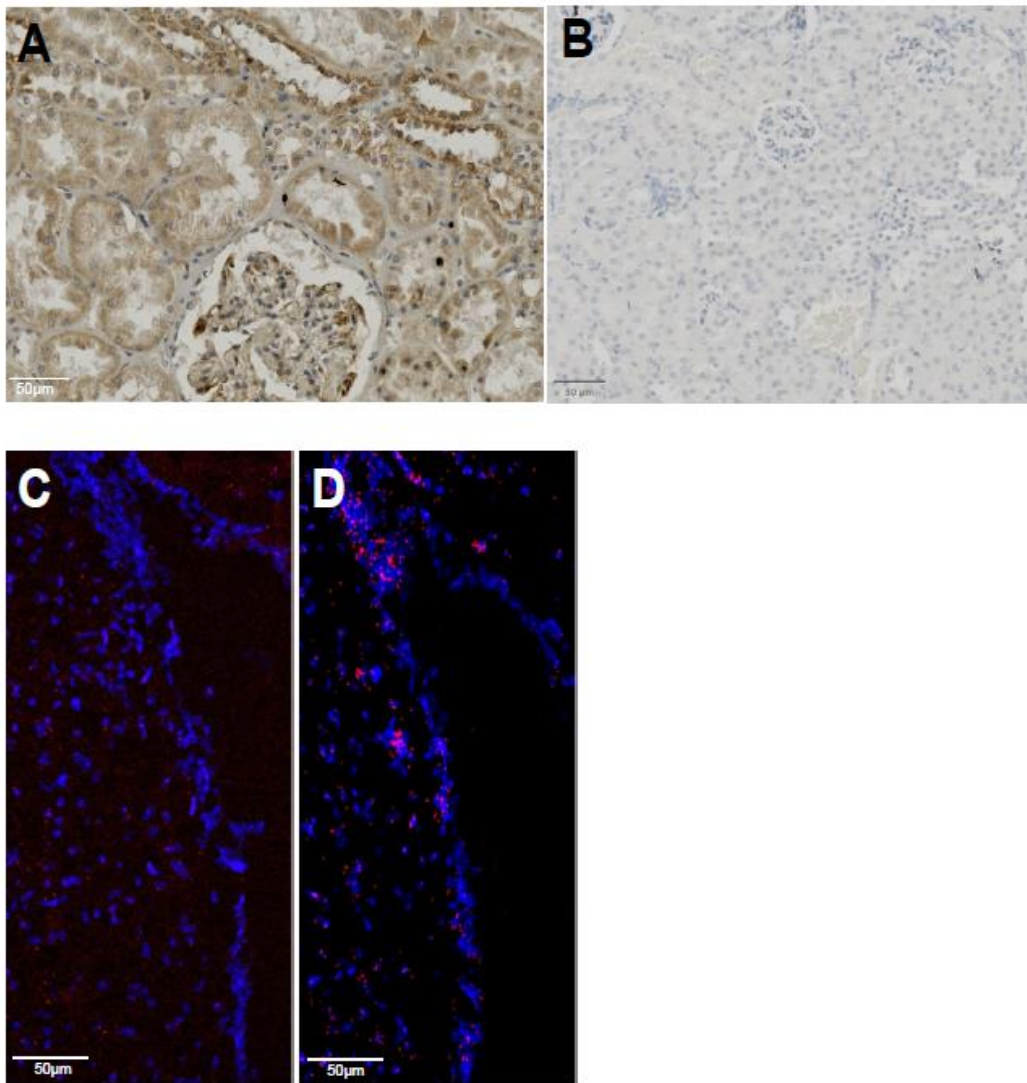

**Figure S1.** c-Cbl expression.

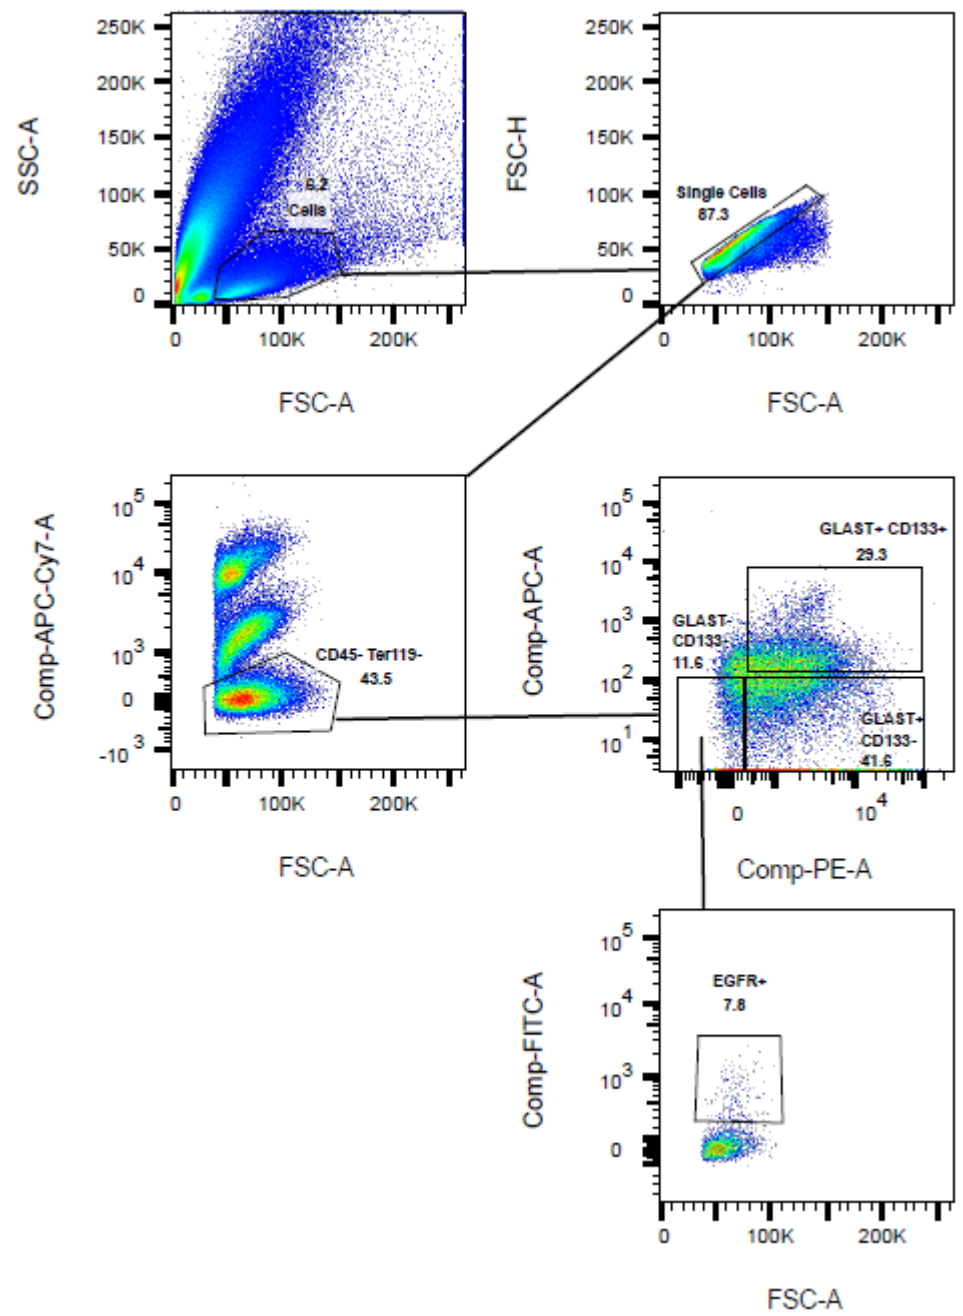

**Figure S2.** FACS procedure for the isolation of NSCs, TAPs, and astrocytes from the SVZ in mice.
